# Supplementary material for: Relationships between Freezing of Gait Severity and Cognitive Deficits in Parkinson’s Disease
Source: MDPI journal article supplement (doi:10.3390/brainsci11111496), 2021-11-12
Supplement: s1 [file s1]

## Supplementary Materials

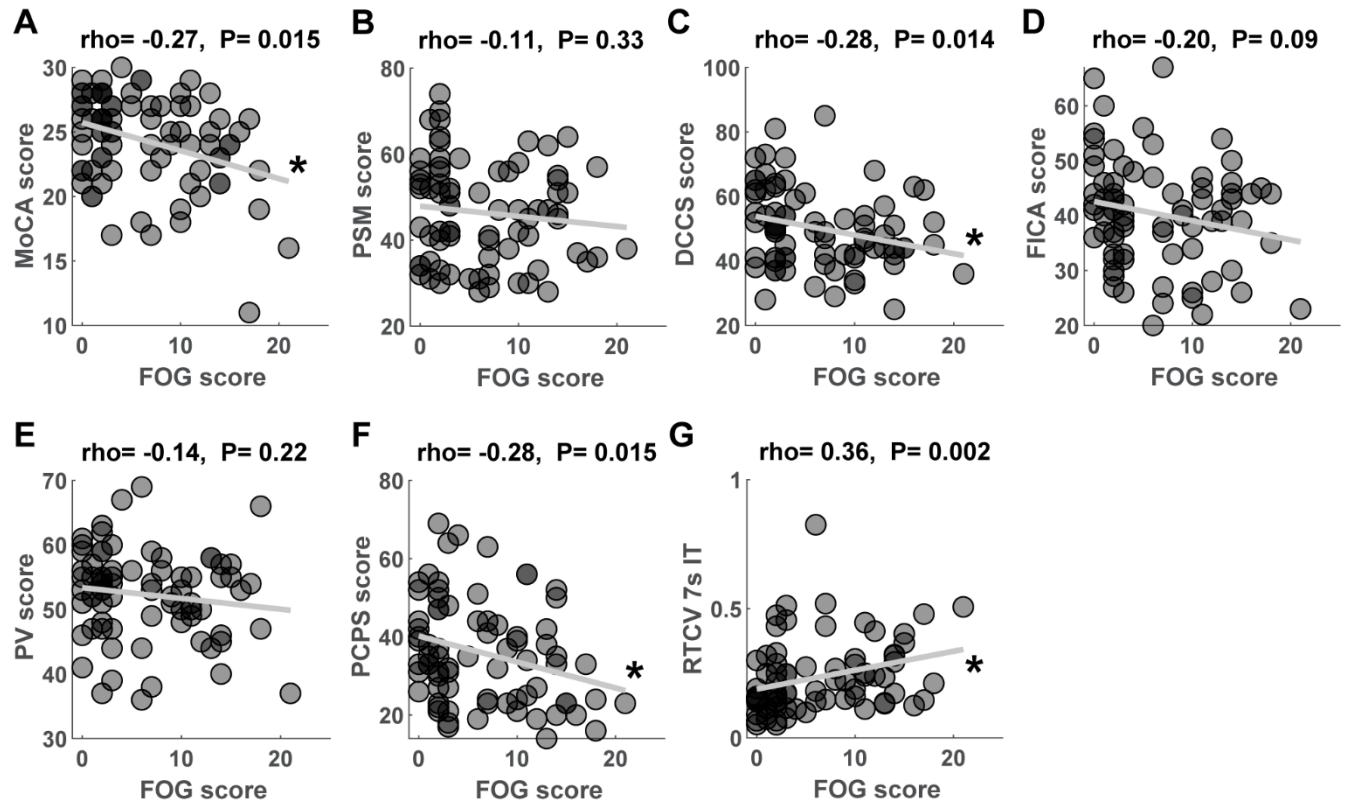

**Fig. S1.** Spearman correlation plots between FOG scores and cognitive measurement scores (A-G) in PD patients. Higher FOG score denotes severe FOG, lower MoCA score (A) and NIH toolbox cognitive tests (B-F), and higher RTCV (G) denote poor cognitive control. \*  $p < 0.05$  represents significant correlation.

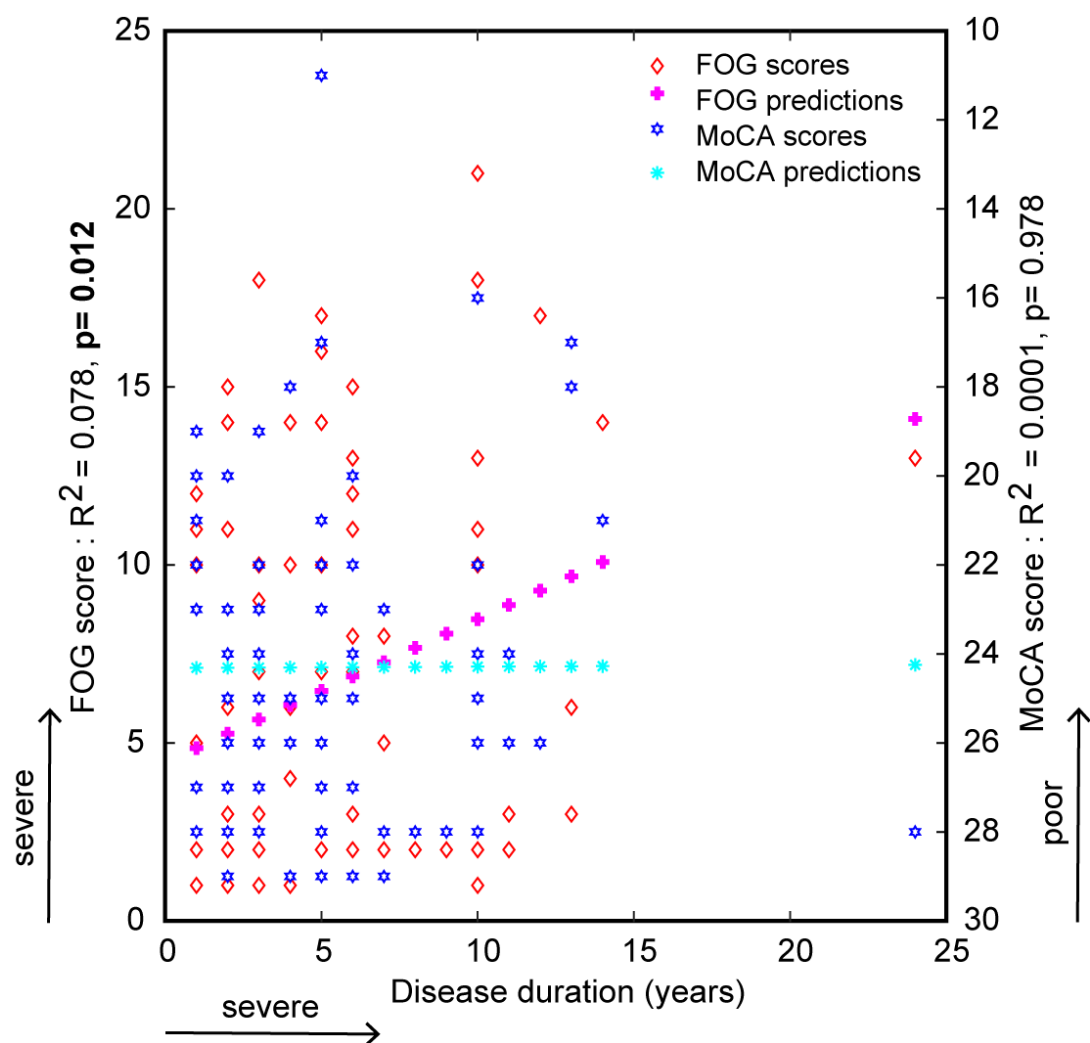

**Fig. S2.** Linear regression analysis and predicted responses between disease duration and FOG severity and cognitive assessment (MoCA) scores. Bold p-value represents the significance.

**Table S1. Cognitive Measurements between PDFOG+ and PDFOG- controlling for variables**

|                                           | Model 1        | Model 2        | Model 3            | Model 4          | Model 5                | Model 6                                  | Model 7                                  |
|-------------------------------------------|----------------|----------------|--------------------|------------------|------------------------|------------------------------------------|------------------------------------------|
| Variable                                  | Age            | Gender         | Years of Education | Disease Duration | Age, Gender, Education | Age, Gender, Education, Disease Duration | Age, Gender, Education, Disease Severity |
| <i>Cognitive function</i>                 |                |                |                    |                  |                        |                                          |                                          |
| MoCA                                      | 4.14 (0.045)*  | 3.74 (0.057)   | 5.22 (0.025)*      | 4.3 (0.041)*     | 4.55 (0.034)*          | 4.7 (0.034)*                             | 0.68 (0.411)                             |
| <i>Episodic memory</i>                    |                |                |                    |                  |                        |                                          |                                          |
| PSM                                       | 0.99 (0.324)   | 1.66 (0.202)   | 0.68 (0.413)       | 1.52 (0.222)     | 0.049 (0.487)          | 0.43 (0.515)                             | 0.58 (0.448)                             |
| <i>Executive function/Attention</i>       |                |                |                    |                  |                        |                                          |                                          |
| DCCS                                      | 7.96 (0.006)** | 8.51 (0.005)** | 8.67 (0.004)**     | 7.9 (0.006)**    | 7.78 (0.007)**         | 7.44 (0.008)**                           | 2.03 (0.159)                             |
| FICA                                      | 2.45 (0.122)   | 2.66 (0.107)   | 2.4 (0.126)        | 2.1 (0.152)      | 1.64 (0.205)           | 1.07 (0.304)                             | 0.18 (0.673)                             |
| <i>Language</i>                           |                |                |                    |                  |                        |                                          |                                          |
| PV                                        | 1.92 (0.17)    | 1.81 (0.182)   | 1.6 (0.21)         | 2.06 (0.155)     | 1.21 (0.276)           | 1.28 (0.262)                             | 1.29 (0.259)                             |
| <i>Processing speed</i>                   |                |                |                    |                  |                        |                                          |                                          |
| PCPS                                      | 1.46 (0.231)   | 1.9 (0.173)    | 2.23 (0.14)        | 2.03 (0.158)     | 1.46 (0.232)           | 1.53 (0.22)                              | 0.07 (0.79)                              |
| <i>Temporal processing/Working memory</i> |                |                |                    |                  |                        |                                          |                                          |
| RTCV                                      | 4.9 (0.03)*    | 4.25 (0.043)*  | 3.77 (0.056)       | 3.99 (0.05)*     | 2.98 (0.089)           | 2.36 (0.129)                             | 0.50 (0.484)                             |

ANCOVAs for differences in cognition between PDFOG+ and PDFOG- controlling for variables. Model 1, adjusting for age; Model 2, adjusting for gender; Model 3, adjusting for years of education; Model 4, adjusting for disease duration; Model 5, adjusting for age, gender, years of education; Model 6, adjusting for all covariates; Model 7, adjusting for age, gender, years of education, and disease severity. Presented as F-value (p-value). \*

p<0.05; \*\* p<0.01

Abbreviations:

MoCA: Montreal Cognitive Assessment

PSM: Picture Sequence Memory test of the NIHTB-CB

DCCS: Dimensional Change Card Sort test of the NIHTB-CB

FICA: Flanker Inhibitory Control and Attention test of the NIHTB-CB

PV: Picture Vocabulary test of the NIHTB-CB

PCPS: Pattern Comparison Processing Speed test of the NIHTB-CB

RTCV: Response Time Coefficient of Variation of 7-s interval timing task
